# Supplementary material for: SLC5A1 Variants in Turkish Patients with Congenital Glucose-Galactose Malabsorption
Source: MDPI journal article supplement (doi:10.3390/genes14071359), 2023-06-27
Supplement: s1 [file s1]

Figure S1 Original images overview

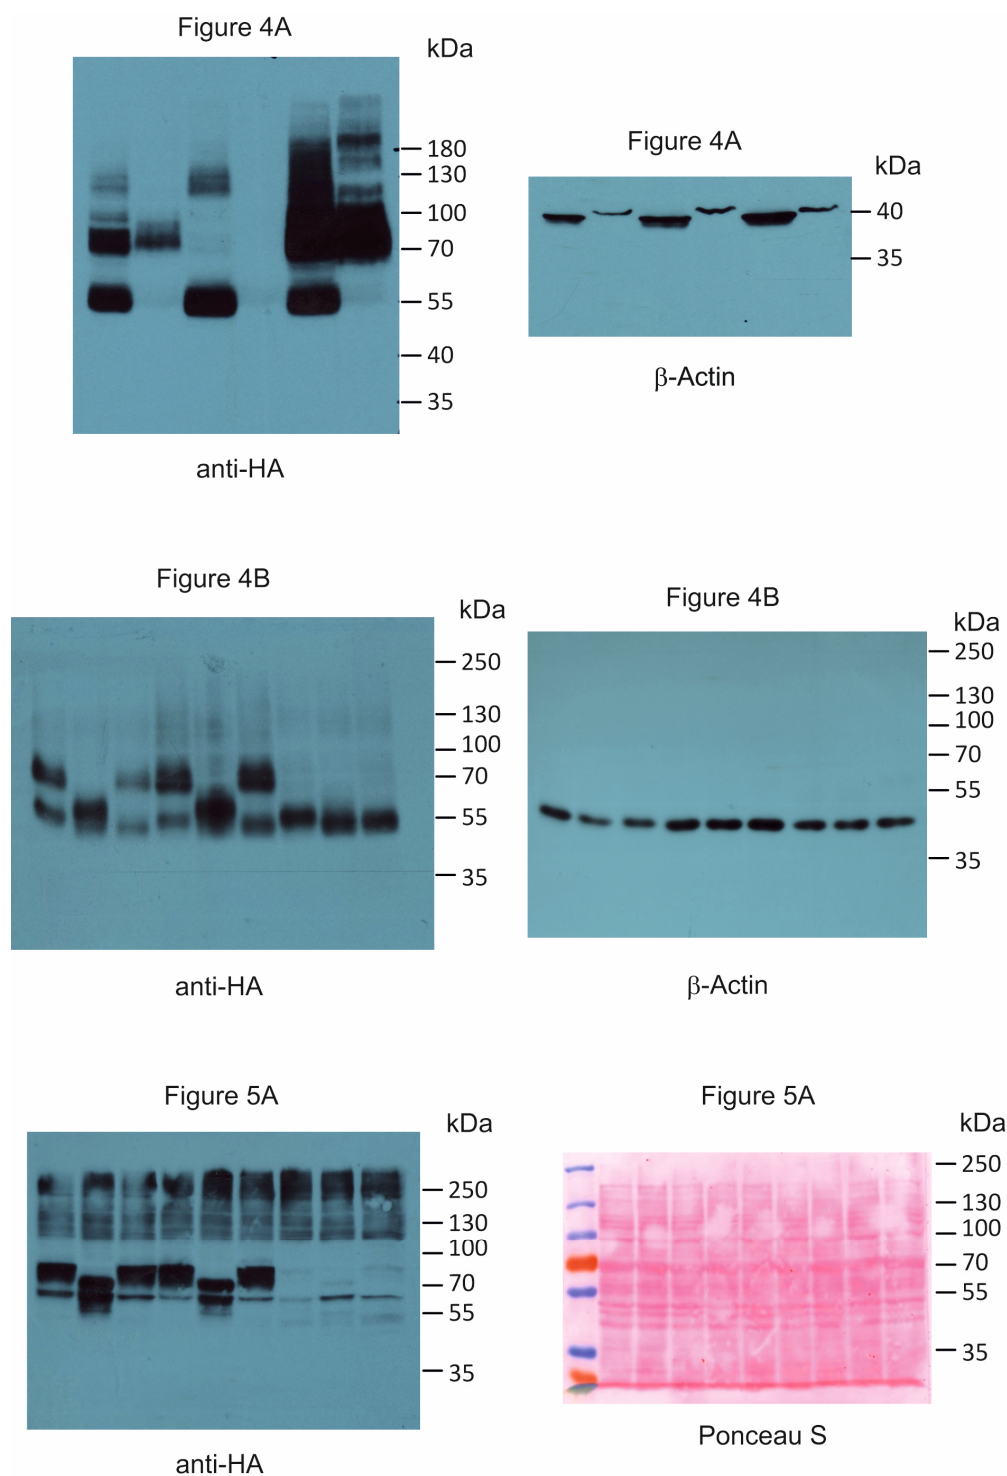

Original gel images refer to the Figures in the main document as indicated by designations "Figure 4A", "Figure 4B" and "Figure 5A".
